# Supplementary material for: An Antigenic Space Framework for Understanding Antibody Escape of SARS-CoV-2 Variants
Source: MDPI journal article supplement (doi:10.3390/v13102009), 2021-10-06
Supplement: s1 [file s1]

## Supplemental Figures (S1-S7) and Tables (S1 to S3)

**Figure S1.** Total Epitope-Paratope Matrix for N-Terminal Domain

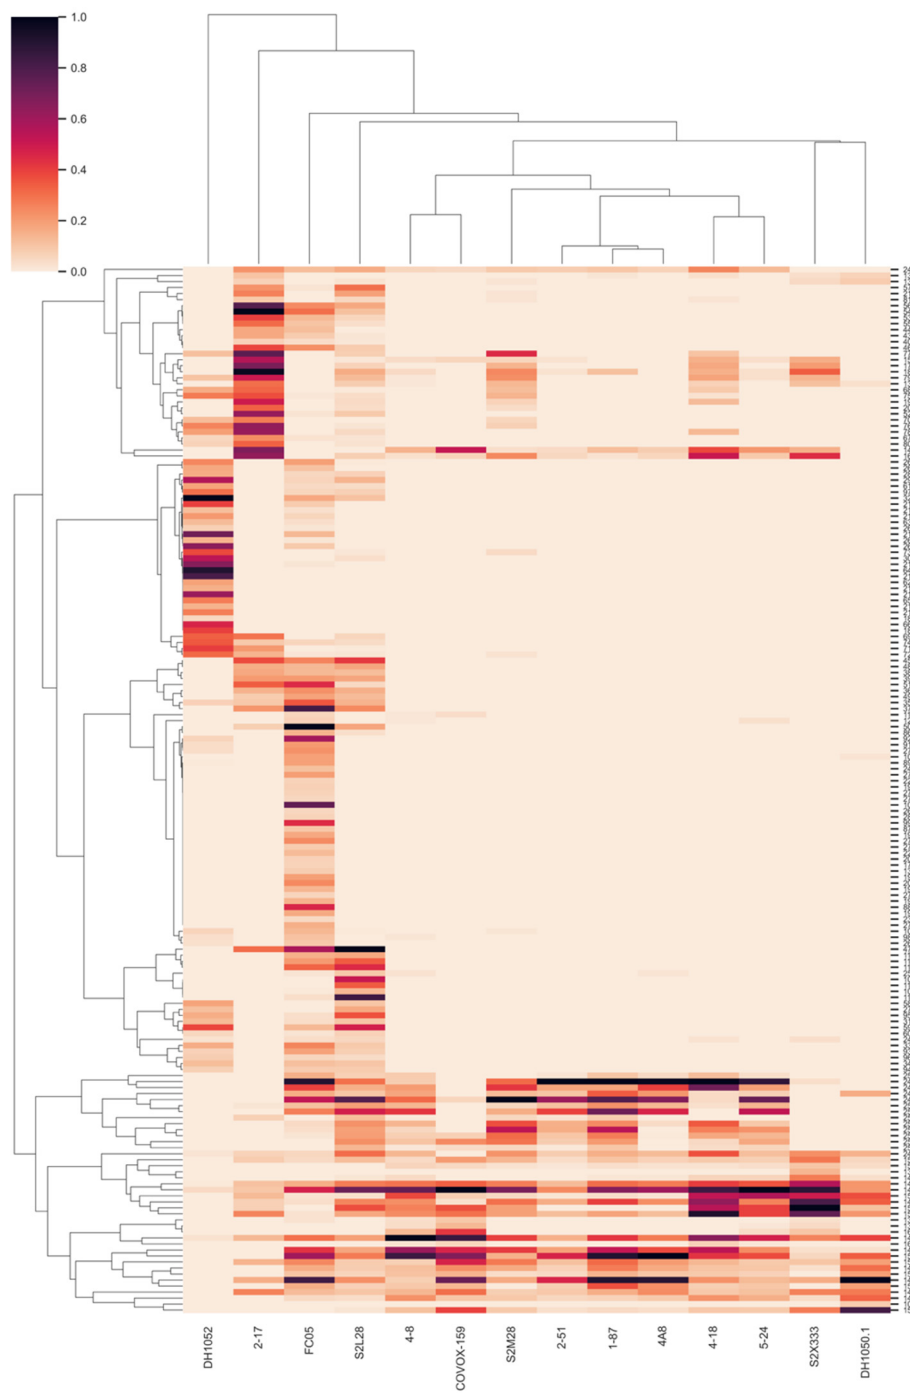

Figure S2: Direct Epitope-Paratope Matrix for RBD

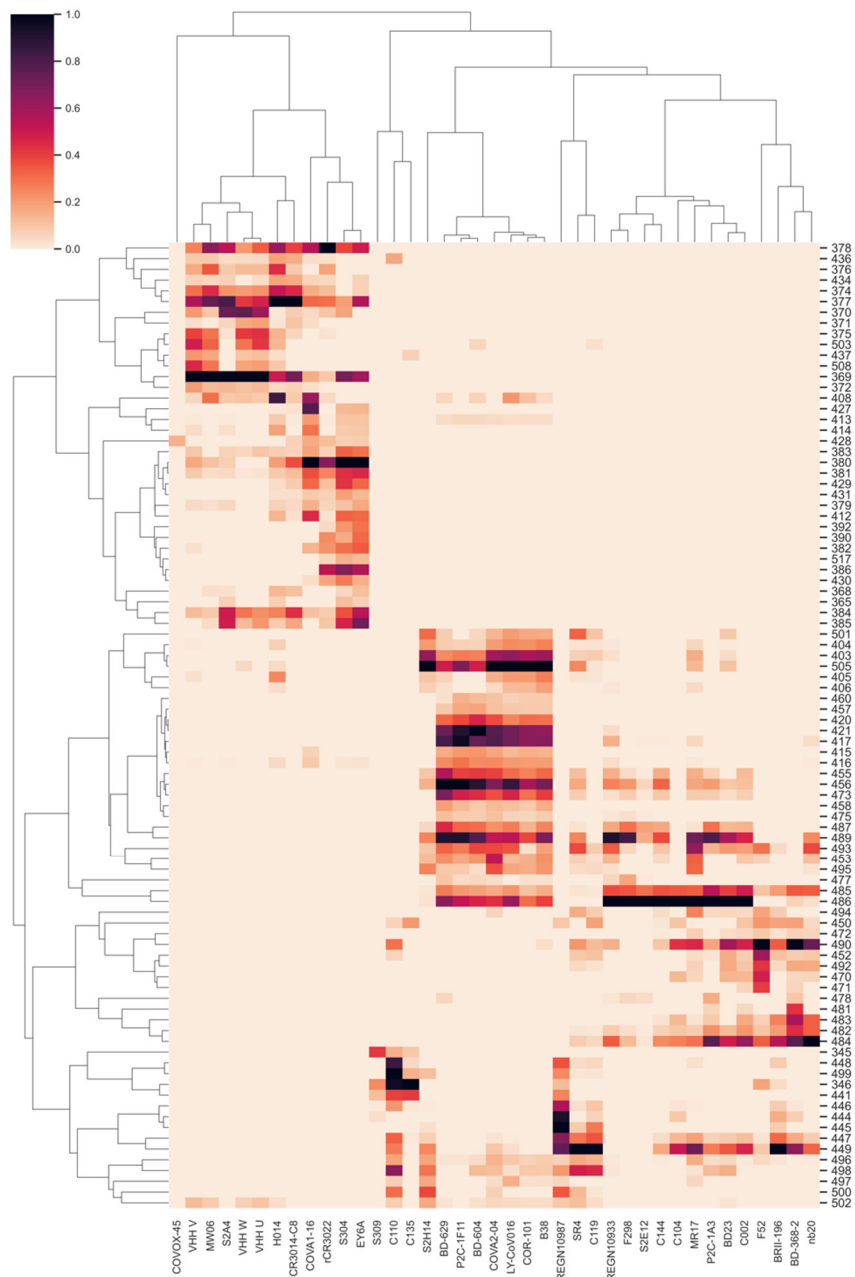

Figure S3: Indirect Epitope-Paratope Matrix for RBD

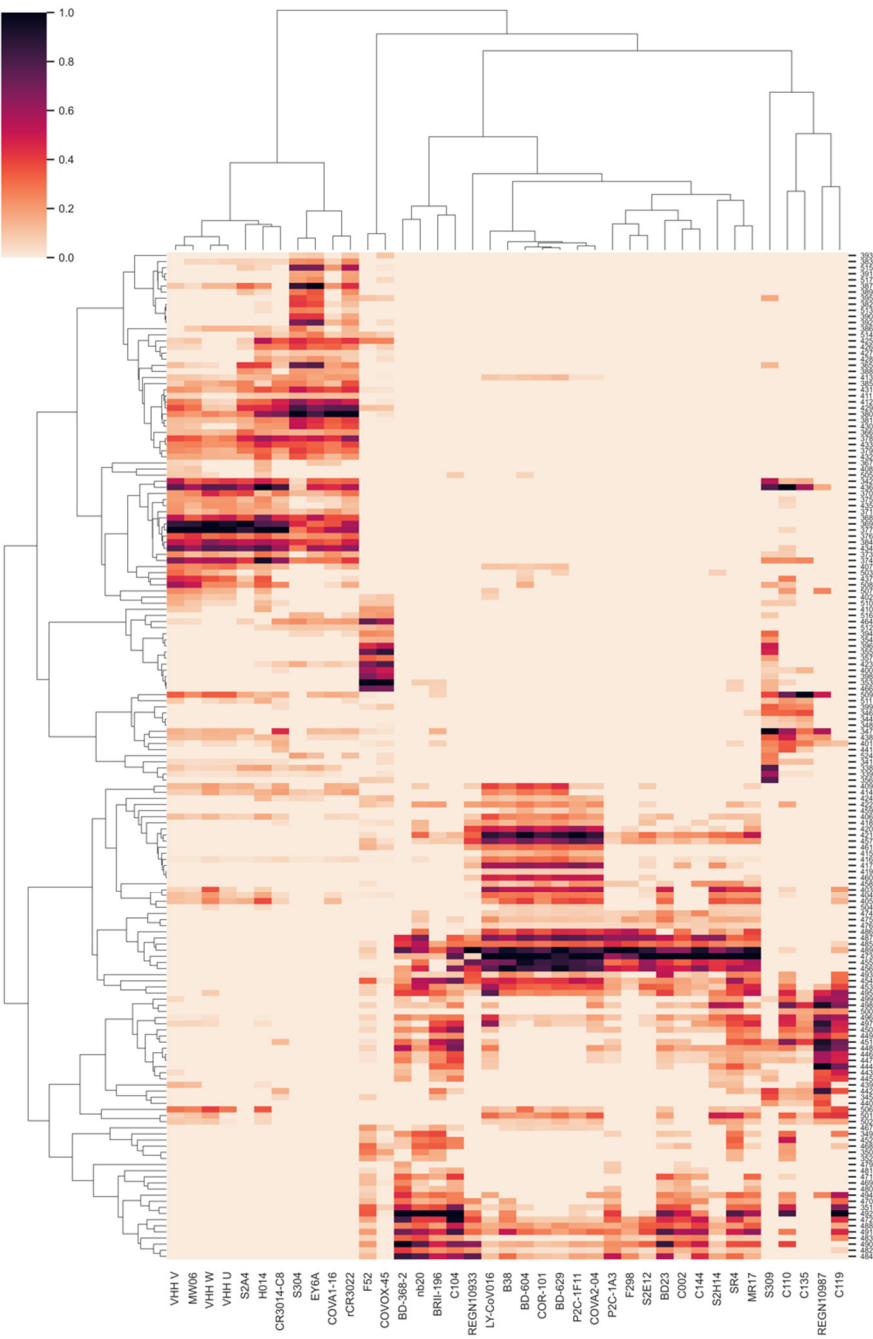

**Figure S4:** Mutability Clustering for RBD SNPs. Top, tSNE visualization of the clustering. Bottom, averaged and normalized values for each cluster along the feature set. Negative values imply knockdowns. Cluster 1 includes the RBD residues that appear the least genetically, structurally, and functionally constrained to mutate.

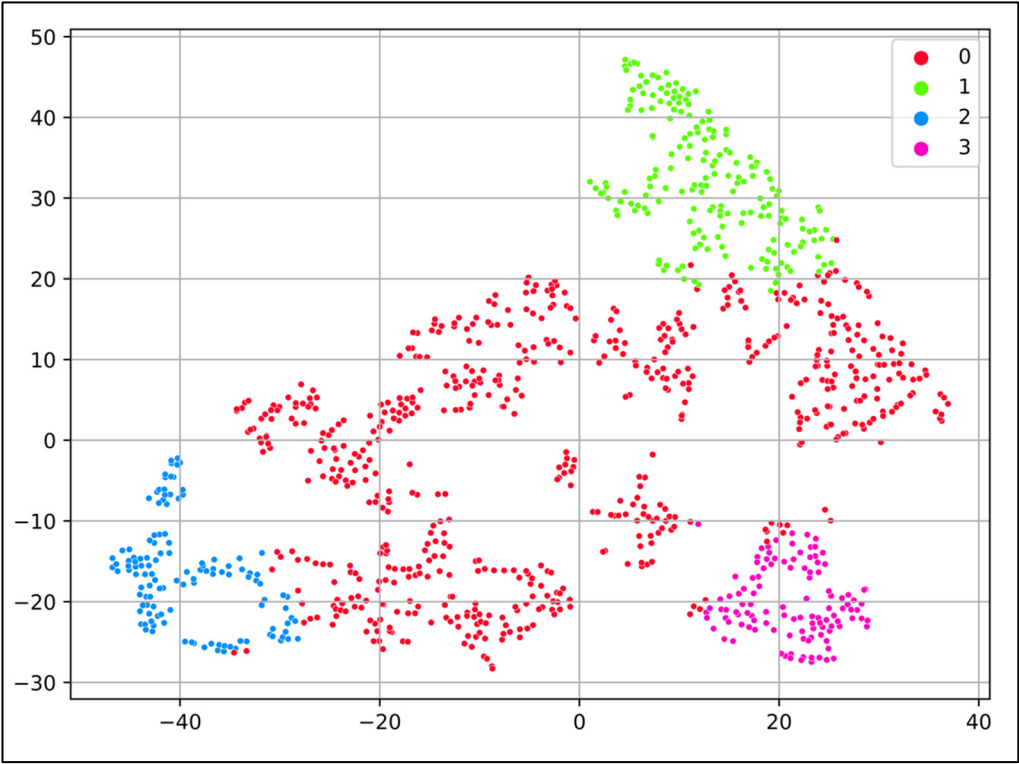

| Cluster | RBD Expression | ACE2 Binding | Within RBD Networking | GISAID % Observed |
|---------|----------------|--------------|-----------------------|-------------------|
| 0       | -0.27          | -0.13        | 0.32                  | 52                |
| 1       | -0.04          | -0.02        | 0.16                  | 100               |
| 2       | -0.63          | -0.83        | 0.40                  | 5                 |
| 3       | -0.06          | -0.02        | 0.12                  | 0                 |

**Figure S5:** PADS-40 for RBD ER-1 and ER-3. ER-1 features substantial similarity across all Abs targeting it, including CR3002, S304, and EY6A, and as a result we observe a single large cluster of residues. Pan-ER1 residues that interact most strongly with the largest subset of ER-1 mAbs reside in the center of the cluster, such as I368, K378, P384, and I434. Meanwhile, ER-2 separates into two clusters and the unique residue R346. ER-2 features little overlap across Abs, with one cluster containing S309-oriented sites and the second containing COVOX-45/F52 oriented sites.

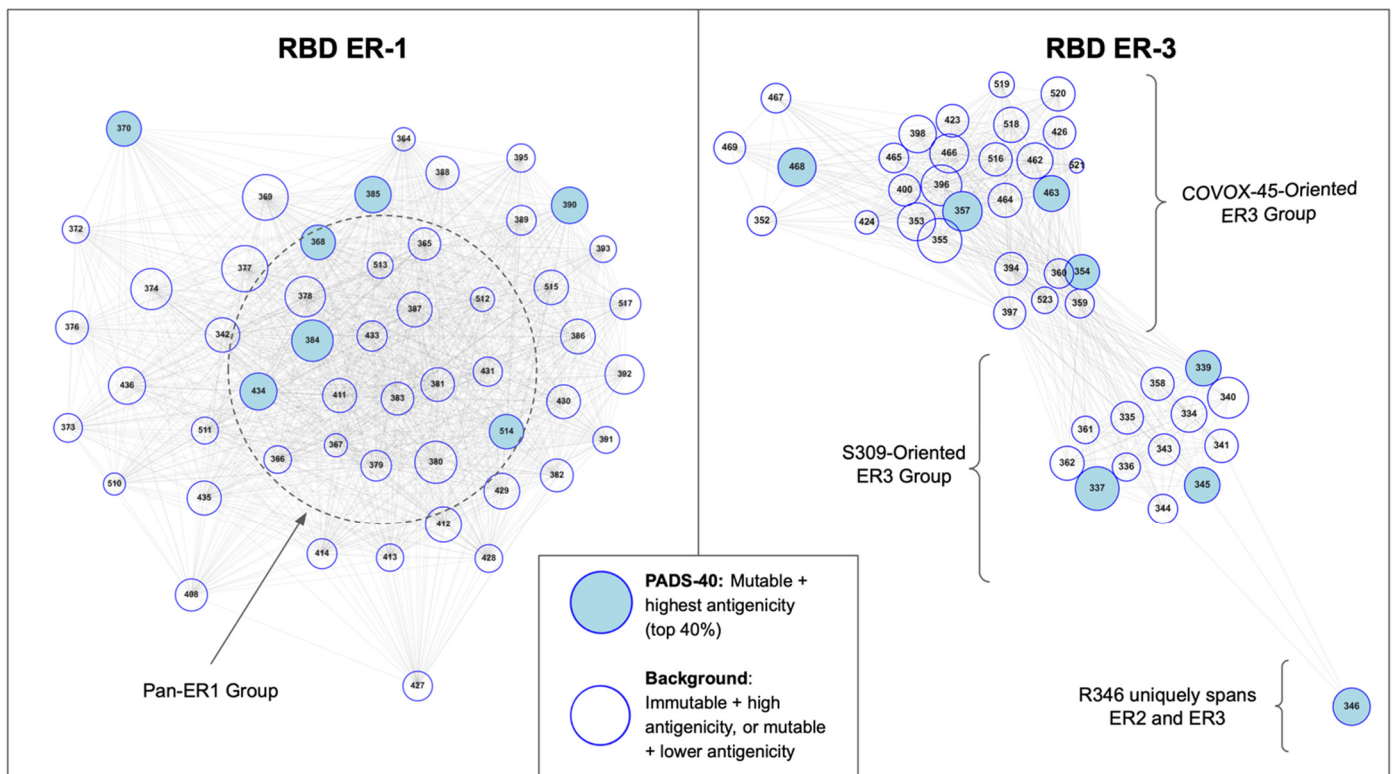

**Table S1:** RBD Spectral Clustering Features

|                             | Genetic Feature                                      | Structural Feature                              | Functional Feature                            |
|-----------------------------|------------------------------------------------------|-------------------------------------------------|-----------------------------------------------|
| <b>Computational Tool</b>   | SNP mask                                             | Within RBD<br>Networking (SIN)                  | N/A                                           |
| <b>Experimental Dataset</b> | GISAID Mutation<br>Frequencies<br>[Shu et al., 2017] | RBD $\Delta$ Expression<br>[Starr et al., 2020] | ACE2 $\Delta$ Binding<br>[Starr et al., 2020] |

**Table S2:** RBD Antigenicity PCA Features

| PCA Feature                                                 | Tool                                  |
|-------------------------------------------------------------|---------------------------------------|
| RBD-mAb Surface<br>Complementarity Absolute<br>Perturbation | PyRosetta –<br>InterfaceAnalyzerMover |
| RBD-mAb Binding Energy (dG)                                 | PyRosetta –<br>InterfaceAnalyzerMover |
| RBD-mAb Direct Networking                                   | EPCN - Direct                         |
| RBD-mAb Indirect Networking                                 | EPCN - Indirect                       |

**Table S3:** mAb/Nanobody – RBD/NTD Complexes

| Antibody/Nanobody                  | PDB                                | Reference                  |
|------------------------------------|------------------------------------|----------------------------|
| <u><b>ACE2</b></u>                 |                                    |                            |
| N/A – ACE2                         | 6M0J                               | Lan et al., 2020           |
| <u><b>RBD</b></u>                  |                                    |                            |
| REGN10933, REGN10987               | 6XDG                               | Hansen et al., 2020        |
| COR-101 (STE90-C11)                | 7B3O                               | Bertoglio et al., 2020     |
| BRII-196                           | 7BWJ                               | Ju et al., 2020            |
| BD23                               | 7BYR                               | Cao et al., 2020           |
| B38                                | 7BZ5                               | Wu Y et al., 2020          |
| LY-CoV016                          | 7C01                               | Shi et al., 2020           |
| SR4, MR17                          | 7C8V, 7C8W                         | Li et al., 2020            |
| H014                               | 7CAH                               | Lv et al., 2020            |
| P2C-1F11, P2C-1A3                  | 7CDI, 7CDJ                         | Ge et al., 2021            |
| BD-604, BD-629, BD-368-2           | 7CH4, 7CH5, 7CHH                   | Du et al., 2020            |
| COVA2-04                           | 7JMO                               | Wu NC et al., 2020         |
| COVA1-16                           | 7JMW                               | Liu et al., 2020           |
| S2A4, S304, S309, S2H14            | 7JVA, 7JW0, 7JX3                   | Piccoli et al., 2020       |
| nb20                               | 7JVB                               | Xiang et al., 2020         |
| C002, C104, C110, C119, C135, C144 | 7K8S, 7K8U, 7K8V, 7K8W, 7K8Z, 7K90 | Barnes et al., 2020        |
| F52, F298                          | 7K9Z                               | Rujas et al. 2020          |
| S2E12                              | 7K45                               | Tortorici et al., 2020     |
| rCR3022                            | 6XC7                               | Yuan et al., 2020          |
| EY6A                               | 6ZER                               | Zhou et al., 2020          |
| CR3014-C8                          | 7KZB                               | Rouet et al., 2021         |
| MW06                               | 7DPM                               | Jiang et al., 2021         |
| VHH U, VHH V, VHH W                | 7KN5, 7KN6, 7KN7                   | Koenig et al. 2021         |
| COVOX-45                           | 7BEL                               | Dejnirattisai et al., 2021 |
| <u><b>NTD</b></u>                  |                                    |                            |
| 4-18, 5-24, 2-51, 1-87, 2-17       | 7L2E, 7L2F, 7L2C, 7L2D, 7LQW       | Cerutti et al., 2021       |
| 4A8                                | 7C2L                               | Chi et al., 2020           |
| FC05                               | 7CWS                               | Wang N. et al., 2021       |
| S2L28, S2X33, S2M28                | 7LXX, 7LXY, 7LY3                   | McCallum et al., 2021a     |
| COVOX-159                          | 7NDC                               | Dejnirattisai et al., 2021 |
| DH1052, DH1050.1                   | 7LAB, 7LCN                         | Li et al., 2021            |
